# Supplementary material
Source: Springer Nature journal article supplement (https://www.springerprofessional.de/resource/supplementary/40493_2014_8_MOESM9_ESM.pdf/11899610)

False Negatives vs. False Positives

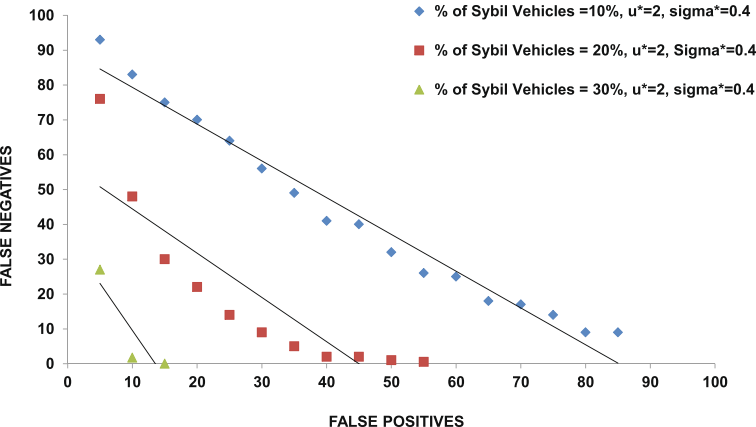

Supplement: MOESM9 [file 11899610]
